# Supplementary material for: Measuring the Closeness of Relationships: A Comprehensive Evaluation of the 'Inclusion of the Other in the Self' Scale
Source: PubMed Central journal article supplement (PMC4466912; doi:10.1371/journal.pone.0129478), 2015-06-12

S1 Figure.

A: "Inclusion of the Other in the Self" (IOS) scale

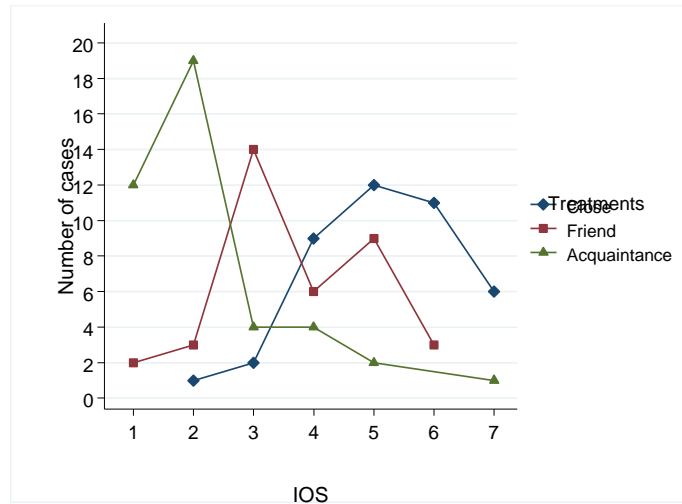

B: "We" scale

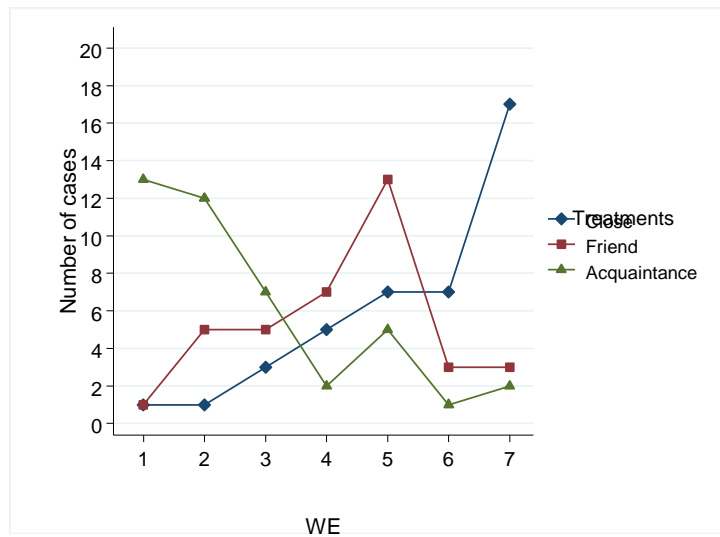

C: "Subjective Closeness Index" (SCI)

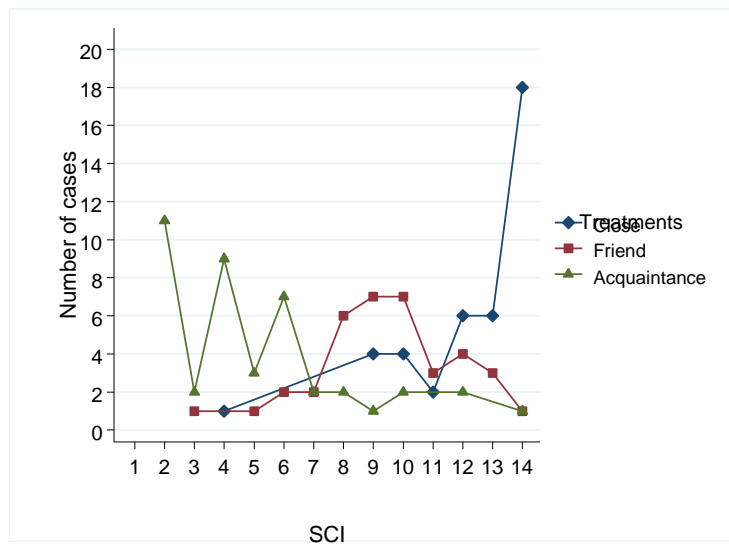

Supplement: pone.0129478.s002.pdf [file pone.0129478.s002.pdf]
