# Supplementary material for: Measuring the Closeness of Relationships: A Comprehensive Evaluation of the 'Inclusion of the Other in the Self' Scale
Source: PubMed Central journal article supplement (PMC4466912; doi:10.1371/journal.pone.0129478), 2015-06-12

**S2 Figure.**

**A: "Inclusion of the Other in the Self" (IOS) scale**

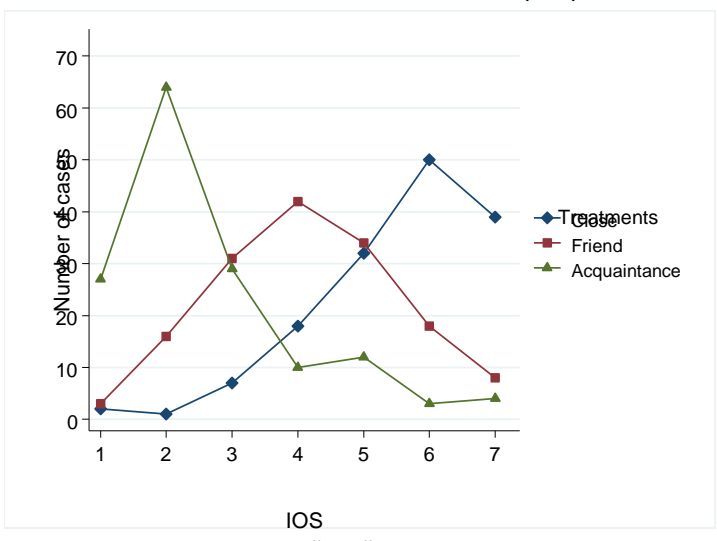

**B: "We" scale**

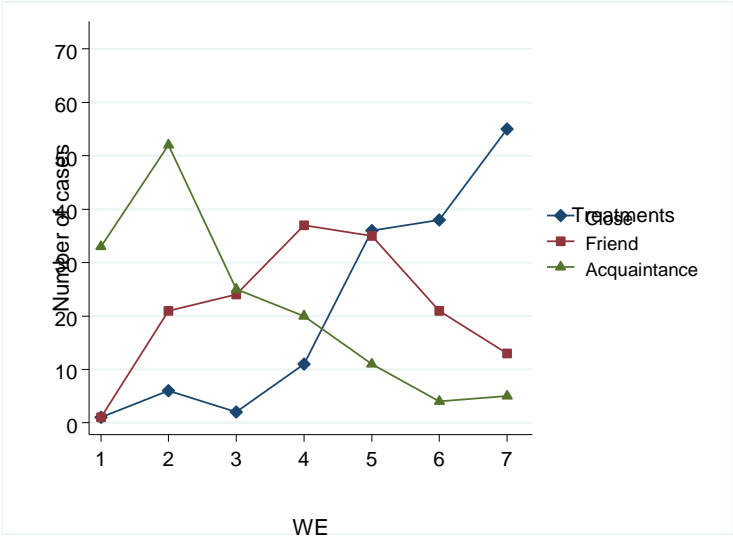

**C: "Subjective Closeness Index" (SCI)**

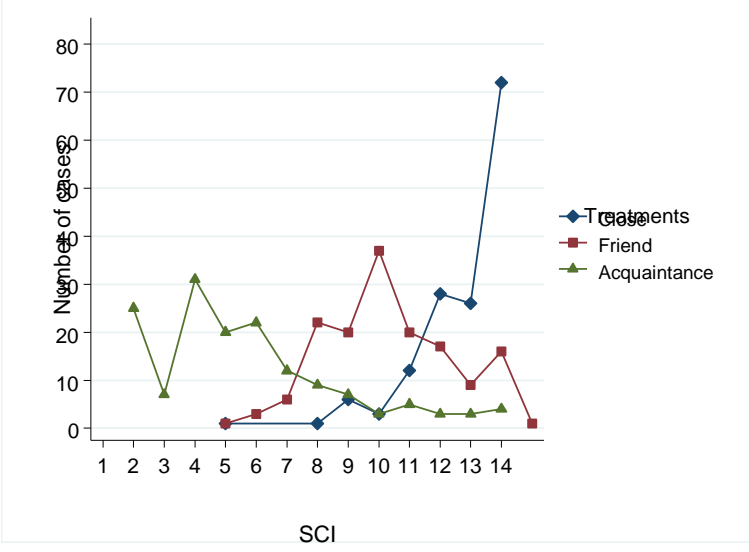

D: "Relationship Closeness Inventory" (RCI)

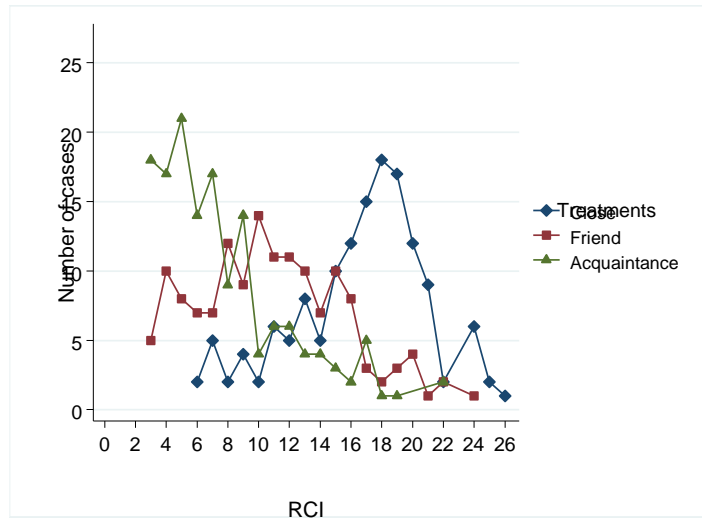

E: "Love and Liking" Scales

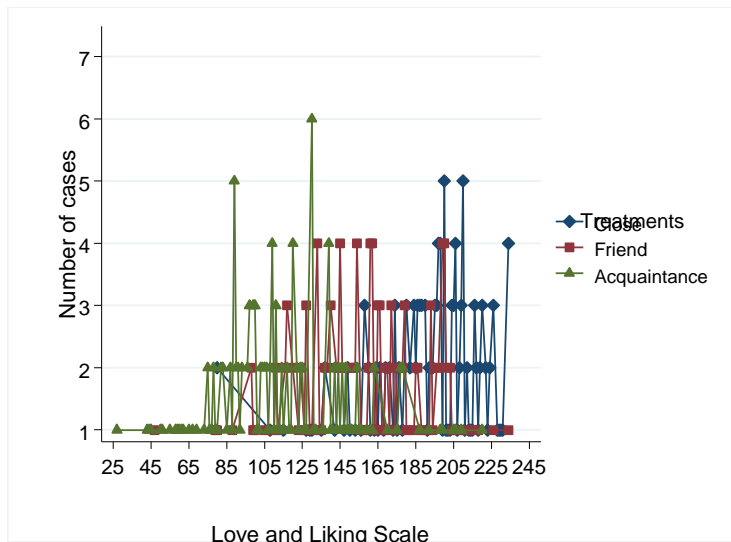

F: "Personal Acquaintance Measure" (PAM)

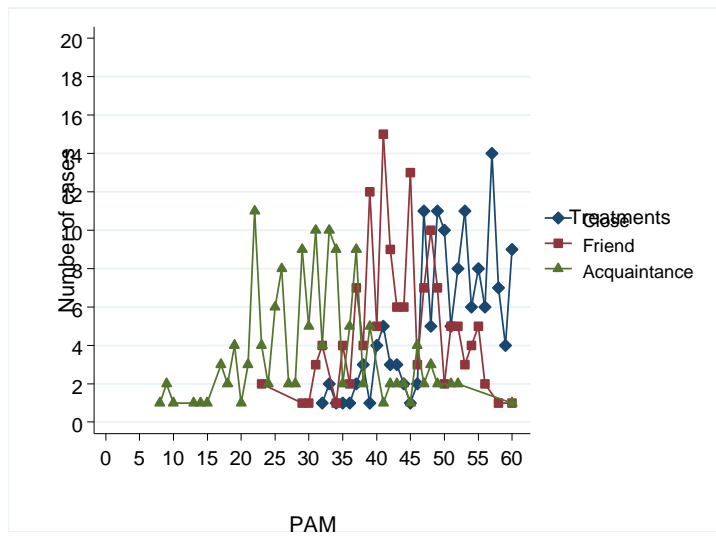

Supplement: pone.0129478.s003.pdf [file pone.0129478.s003.pdf]
